# Supplementary material for: Changes in pulmonary endothelial cell properties during bleomycin-induced pulmonary fibrosis
Source: Springer Nature journal article supplement (doi:10.1186/s12931-018-0831-y), 2018-06-25

## Unstained

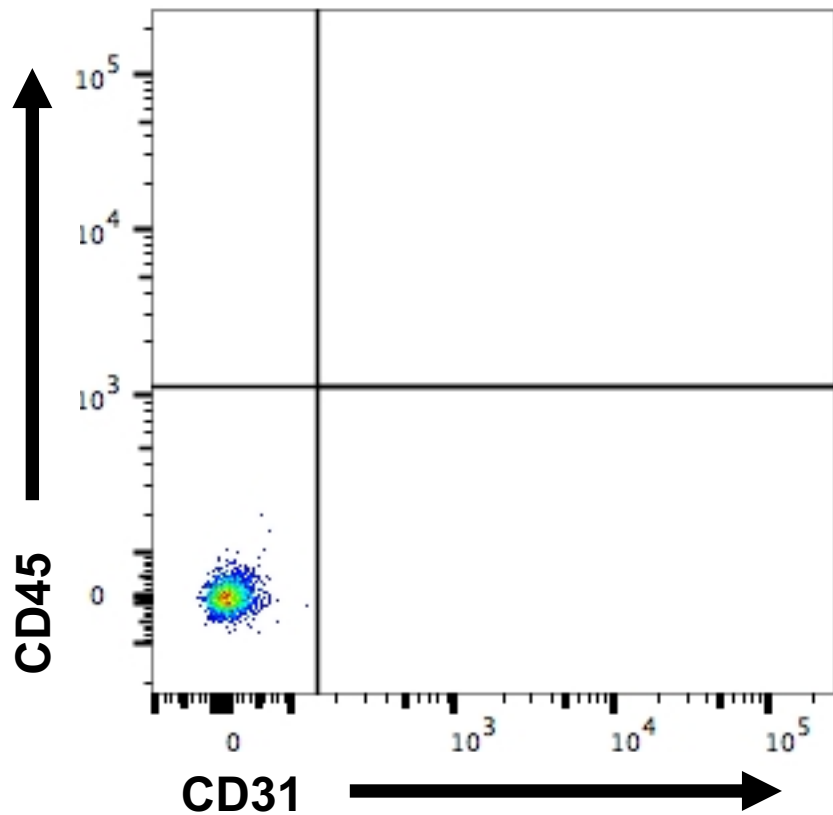

## Stained

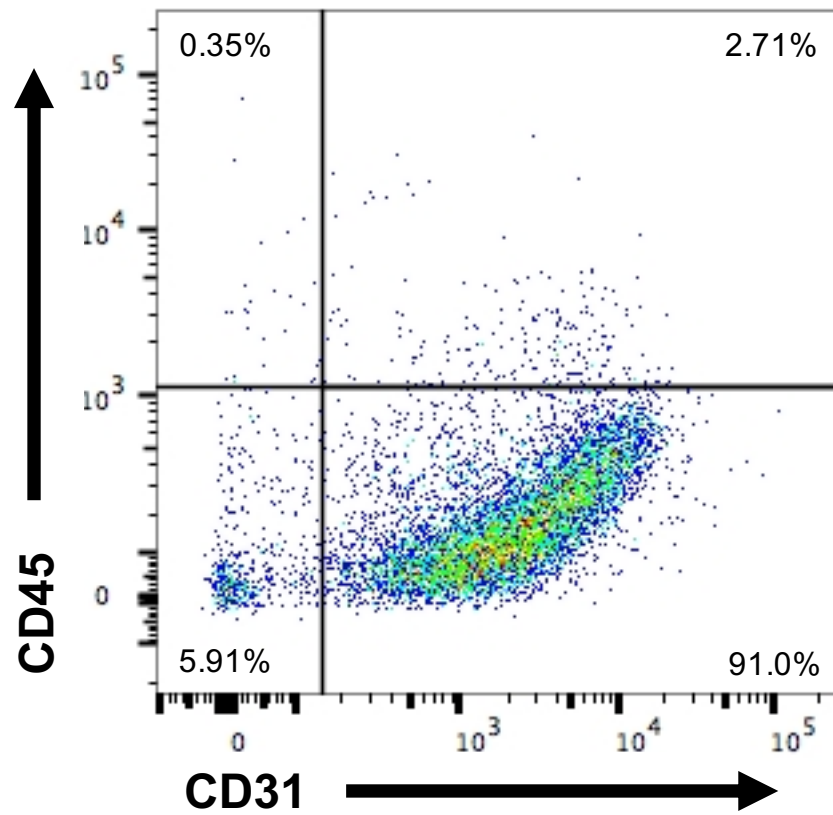

Supplement: MOESM1 [file 15882290]
